# Supplementary material for: Autonomous Landing of Micro Unmanned Aerial Vehicles with Landing-Assistive Platform and Robust Spherical Object Detection
Source: MDPI journal article supplement (doi:10.3390/app11188555), 2021-09-15
Supplement: s1 [file s1]

Archive with 2 entries (2 files):
- Autonomous landing of MAV.mp4
- Supplementary material-final.pdf
